# Supplementary material for: Progressive Left Ventricular Remodeling for Predicting Mortality in Children With Dilated Cardiomyopathy: The Pediatric Cardiomyopathy Registry
Source: PubMed Central journal article supplement — J Am Heart Assoc. 2024 Jan 12;13(2):e022557. doi: 10.1161/JAHA.121.022557 (PMC10926795; doi:10.1161/jaha.121.022557), 2024-01-12
Supplement: JAH3-13-e022557-s001.pdf [file JAH3-13-e022557-s001.pdf]

# **SUPPLEMENTAL MATERIAL**

## **Pediatric Cardiomyopathy Registry Investigators**

Columbia University Medical Center New York, NY: *Linda A. Addonizio, MD, Teresa M. Lee MD, and Irene D. Lytrivi MD;*

Helen Devos Children's Hospital, Grand Rapids MI: *Jean A. Ballweg MD;*

Mt. Sinai Kravis Children's Heart Center New York, NY: *Neha Bansal MD;*

Washington University, St. Louis, MO: *Charles E. Canter MD;*

Boston Children's Hospital, Harvard Medical School, Boston, MA: *Wendy K. Chung MD, PhD, Steven D. Colan, MD, and Lynn A. Sleeper ScD;*

Children's Hospital Colorado, Denver, CO: *Melanie D. Everitt, MD;*

University of Pittsburgh, Pittsburgh, PA: *Brian D. Feingold MD;*

New England Research Institutes, Watertown, MA *Taye H. Hamza, PhD and Ling Shi, PhD;*

The Children's Hospital at Montefiore, Bronx, NY: *Daphne T. Hsu MD and Jacqueline M. Lamour, MD;*

Children's Hospital Los Angeles and Keck School of Medicine of USC, Los Angeles, CA: *Paul F. Kantor, MBBCh;*

University of Wisconsin School of Medicine and Public Health, Madison, WI: *Sonya Kirmani, MD;*

Primary Children's Hospital, University of Utah, Salt Lake City, UT: *Ashwin K. Lal MD and Kimberly M. Molina MD;*

University at Buffalo Jacobs School of Medicine and Biomedical Sciences, Buffalo, NY *Steven E. Lipshultz, MD;*

Harvard T.H. Chan School of Public Health, Boston, MA: *E. John Orav, PhD;*

Ann and Robert H. Lurie Children's Hospital of Chicago, Chicago, IL: *Elfriede Pahl, MD and Philip T. Thrush MD;*

Children's Hospital of Philadelphia, Philadelphia, PA: *Joseph W. Rossano MD, MS;*

University of Miami, Miami, FL: *Paolo G. Rusconi, MD;*

Cincinnati Children's Hospital Medical Center, Cincinnati, OH: *Thomas D. Ryan MD, PhD;*

Le Bonheur Children's Hospital, Memphis, TN: *Jeffrey A. Towbin, MD;*

Indiana University School of Medicine, Indianapolis, IN: *Stephanie A. Ware, MD, PhD;*

Monroe Carell Jr. Children's Hospital at Vanderbilt, Nashville, TN: *Steven A. Webber, MBChB, James D. Wilkinson, MD, MPH, and Debra A. Dodd MD.*
